# Supplementary material for: Downstream Distribution and Postdepositional Mobilization of Cadmium in Alluvial Soils
Source: Hindawi journal article supplement (doi:10.1155/2023/9915654), 2023-03-29
Supplement: f1 [file 9915654.f1.pdf]

# Downstream distribution and post-depositional mobilization of cadmium in alluvial soils – Supplementary material

**Table S1** Lambert-72 coordinates of the sampling locations

| Profile         | X      | Y      | River, riverbank, distance <sup>1</sup> |
|-----------------|--------|--------|-----------------------------------------|
| <b>Site I</b>   |        |        |                                         |
| GB1a            | 202470 | 192730 | Grote Beek, L, 1m                       |
| GB1b            | 202670 | 192450 | Grote Beek, L, 1 m                      |
| GB1c            | 202640 | 192680 | Grote Beek, L, 3 m                      |
| GB2             | 202670 | 192430 | Grote Beek, L, 25 m                     |
| GB3             | 202700 | 192750 | Grote Beek, L, 50 m                     |
| L <sup>2</sup>  | 202650 | 192670 | Grote Beek, R, 3 m                      |
| M <sup>2</sup>  | 202640 | 192670 | Grote Beek, R, 25 m                     |
| <b>Site II</b>  |        |        |                                         |
| ZW1             | 196340 | 188840 | Zwart Water, R, 1m                      |
| ZW2             | 196340 | 188865 | Zwart Water, R, 25 m                    |
| ZW3             | 196340 | 188890 | Zwart Water, R, 50 m                    |
| <b>Site III</b> |        |        |                                         |
| HU1             | 193000 | 189025 | Hulpe, L, 1 m                           |
| HU2             | 193000 | 189010 | Hulpe, L, 10 m                          |
| HU3             | 193000 | 188999 | Hulpe, L, 25 m                          |
| HU4             | 193000 | 188976 | Hulpe, L, 50 m                          |

<sup>1</sup>L = left riverbank, R = right riverbank, distance = distance from river

<sup>2</sup> Data from Cappuyns and Swennen [42]

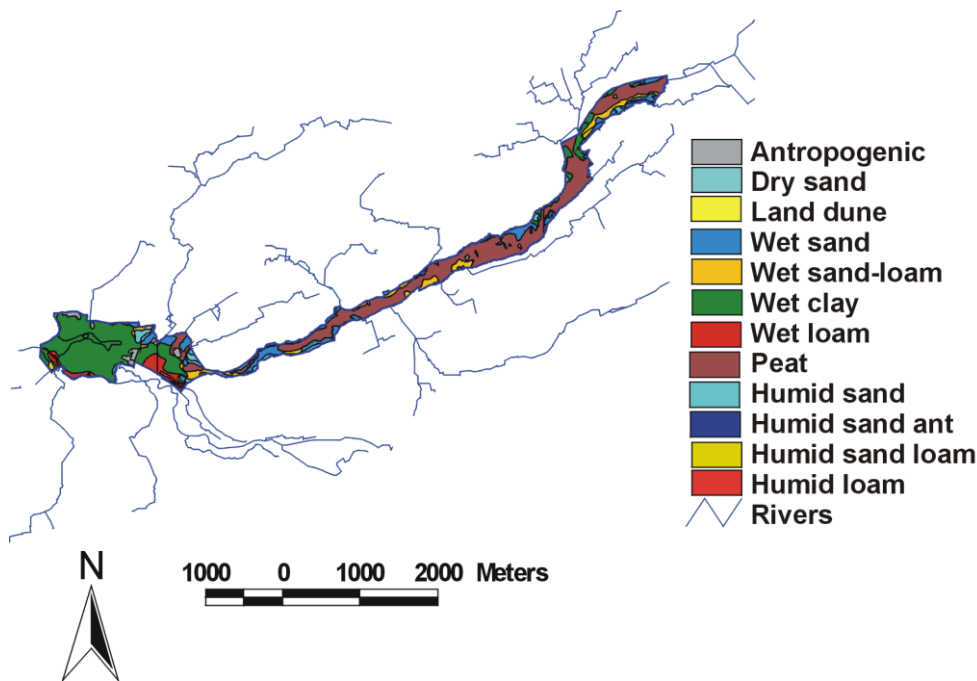

**Figure S1** Occurrence of different soil types along the Winterbeek

**Figure S2** Cross section of the Grote Beek (Site I). TAW stands for "Tweede Algemeen Waterpassing", The Second General Water Adjustment, which is the reference height against which height measurements are expressed in Belgium.

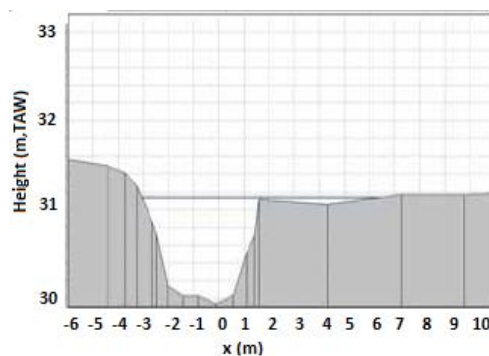

Modified after Ministry of the Flemish Community, Department of Water (2002). De Winterbeek Computermodellering als methode, hoogwaterbeheer als doel. [Winter Brook Computer modeling as method, flood management as goal]. D/2002/3241/039.

**Table S2** Profile descriptions and soil characteristics

| Site I     | Grote Beek: Profile GB1a                                                                                                                                                          | OC % | CEC cmol/kg | clay % | silt % | sand % |
|------------|-----------------------------------------------------------------------------------------------------------------------------------------------------------------------------------|------|-------------|--------|--------|--------|
| Depth      | Description                                                                                                                                                                       |      |             |        |        |        |
| 0-20 cm    | 10YR3/3 (dark brown); fine roots; crumb structure; occurrence of plastic grains                                                                                                   | 8.8  | 19.2        | NA     | NA     | NA     |
| 20-40 cm   | Matrix: 10YR3/3 (dark brown); rust (7.5YR5/6 (bright brown)); fine roots; crumb structure; occurrence of plastic grains                                                           | 6.9  | 18.0        | NA     | NA     | NA     |
| 40-60 cm   | Matrix:10YR2/2 (brownish black); numerous rust spots (7.5YR4/6, brown); some green (10Y6/2, olive gray) spots, loam; crumb structure; occurrence of plastic grains; wavy boundary | 6.9  | 18.0        | NA     | NA     | NA     |
| 60-80 cm   | Matrix: 7.5YR3/3 (dark brown); numerous rust spots (5YR5/8, bright reddish brown); loam; sticky; occurrence of plastic grains                                                     | 13.1 | 40.4        | NA     | NA     | NA     |
| 80-100 cm  | Matrix: 5YR2/1 (brownish black); rust (7.5YR5/6, bright brown); lenses of green (7.5GY5/1,dark greenish gray) sand; loam; sticky                                                  | 12.0 | 38.0        | NA     | NA     | NA     |
| 100-120 cm | 7.5GY4/1 (dark greenish gray); fine sand; loose structure                                                                                                                         | 0.5  | 11.2        | NA     | NA     | NA     |
| 120-140 cm | 7.5GY4/1 (dark greenish gray); fine sand; loose structure                                                                                                                         | 0.5  | 11.0        | NA     | NA     | NA     |
| 140-175 cm | 2.5GY4/1 (dark olive gray); coarse sand; loose structure                                                                                                                          | 0.5  | 10.0        | NA     | NA     | NA     |
| Site I     | Grote Beek: Profile GB1b                                                                                                                                                          | OC % | CEC cmol/kg | clay % | silt % | sand % |
| Depth      | Description                                                                                                                                                                       |      |             |        |        |        |
| 0-13 cm    | 10YR 2/1 (black); sandy loam; crumb structure, few fine to coarse roots; clear smooth boundary                                                                                    | 4.6  | 20.5        | 17     | 23     | 60     |
| 13-26 cm   | Matrix: 7.5YR 2/2 (brownish black), light yellow (2.5Y7/4) and yellowish brown (2.5Y5/3) spots ; sandy loam; crumb structure; few fine roots; regular boundary                    | 6.5  | 26.3        | 21     | 29     | 50     |
| 26-44 cm   | Matrix: 7.5YR3/2 (brownish black), rust spots (5YR4/8); few fine roots; silty loam                                                                                                | 8.1  | 23.7        | 17     | 24     | 59     |
| 44-57 cm   | Matrix 7.5YR4/6 (brown), olive gray (2.5Y6/4) spots and rust spots (7.5YR5/6), no roots, compact structure; sandy loam                                                            | 0.4  | 9.9         | 17     | 16     | 67     |
| 57-69 cm   | Matrix brownish black (7.5YR2/2); rust (7.5YR5/8) (2-20%) and olive gray (10Y6/2) spots; no roots, sandy loam                                                                     | 1.7  | 16.8        | 16     | 31     | 53     |
| 69-82 cm   | Matrix: 10Y4/2 (grayish olive), rust (7.5YR3/1); friable; sand.                                                                                                                   | 0.2  | 8.1         | 11     | 14     | 75     |
| 82-91 cm   | 5GY 4/1; friable; sand                                                                                                                                                            | 0.2  | 10.6        | 21     | 17     | 62     |
| Site I     | Grote Beek: Profile GB2                                                                                                                                                           | OC % | CEC cmol/kg |        |        |        |
| Depth      | Description                                                                                                                                                                       |      |             |        |        |        |
| 0-30 cm    | Matrix: 7.5 YR2/1 (black); rust nodules (5YR4/6, reddish brown); loam, elevated organic carbon content                                                                            |      |             | 17.1   |        | 34.3   |
| 30-50 cm   | Matrix: 7.5 YR2/1 (black); rust nodules (7.5YR5/8, bright brown and 5YR4/4, dull reddish brown); loam, elevated organic carbon content                                            |      |             | 27.4   |        | 46.6   |
| 50-75 cm   | 7.5 YR2/1 (black); loam, elevated organic carbon content                                                                                                                          |      |             | 12.2   |        | 28.1   |
| 75-100 cm  | 7.5 YR2/1 (black); loam, elevated organic carbon content                                                                                                                          |      |             | 17.9   |        | 33.0   |
| 100-120 cm | 7.5 YR2/1 (black); loam, elevated organic carbon content. Underneath this layer: green sand (7.5GY4/1, dark greenish gray)                                                        |      |             | 10.8   |        | 27.9   |
| Site I     | Grote Beek: Profile GB3                                                                                                                                                           | OC % | CEC cmol/kg |        |        |        |
| Depth      | Description                                                                                                                                                                       |      |             |        |        |        |
| 0-25 cm    | Matrix: 7.5 YR2/1 (black); few rust nodules (5YR4/6, reddish brown); elevated organic carbon content                                                                              |      |             | 35.4   |        | 42.3   |
| 25-50 cm   | Matrix: 7.5 YR2/1 (black); few rust nodules (5YR4/6, reddish brown); elevated organic carbon content                                                                              |      |             | 32.6   |        | 39.2   |
| 50-75 cm   | 7.5GY4.5/1 (dark greenish gray); coarse sand                                                                                                                                      |      |             | 4.5    |        | 12.0   |
| 75-100 cm  | 7.5GY4.5/1 (dark greenish gray); coarse sand                                                                                                                                      |      |             | 1.3    |        | 8.3    |
| Site II    | Zwart Water: Profile ZW1                                                                                                                                                          | OC % | CEC cmol/kg | clay % | silt % | sand % |
| Depth      | Description                                                                                                                                                                       |      |             |        |        |        |
| 0-10       | Matrix: 7.5YR2/2 (brownish-black); rust (5YR4/8), few fine roots; crumb structure; sandy loam; clear abrupt boundary                                                              | 3.5  | 13.5        | 10     | 21     | 69     |
| 10-20      | 5YR3/6 (dark reddish brown), very few fine roots; compact; sandy loam                                                                                                             | 1.5  | 9.8         | 7      | 17     | 76     |
| 20-27      | Matrix: 5YR2/3 (very dark reddish brown), rust (5YR5/6); very few fine roots; friable, loamy sand                                                                                 | 1.0  | 9.0         | 8      | 18     | 74     |
| 27-39      | Matrix: 5YR4/1 (brownish gray), rust (7.5YR5/6), very few fine roots; loamy sand; regular boundary                                                                                | 0.5  | 7.2         | 6      | 16     | 78     |
| 39-45 cm   | Matrix: 7.5YR6/8 (orange), rust 5YR3/6 (red); very few fine roots; friable; sand                                                                                                  | 0.7  | 5.7         | 4      | 13     | 83     |
| 45-58 cm   | Matrix: 7.5YR4/6 (brown), rust 5YR3/6 (red); friable; sand                                                                                                                        | 8.2  | 6.6         | 3      | 7      | 90     |
| 58-63 cm   | Matrix: 7.5 YR2/2 (brownish black); rust 7.5 YR3/6 and green (10GY6/1) spots; sand; abrupt boundary                                                                               | 15.4 | 15.6        | NA     | NA     | NA     |
| 63-83 cm   | Matrix: 10 YR2/2 (brownish black); few rust spots (5YR4/8) and blue spots of vivianite; loamy silt                                                                                | 8.8  | 15.5        | 7      | 38     | 55     |
| 83-95 cm   | Matrix: 10 YR2/1 (black); few rust spots (7.5YR5/8) and blue spots of vivianite; wood fragments; loamy silt                                                                       | 1.6  | 14.7        | 18     | 49     | 33     |

| Site II   | Zwart Water: Profile ZW2                                                                                                              | OC   | CEC     | clay | silt | sand |
|-----------|---------------------------------------------------------------------------------------------------------------------------------------|------|---------|------|------|------|
| Depth     | Description                                                                                                                           | %    | cmol/kg | %    | %    | %    |
| 0-3 cm    | Matrix: 10Y2/1 (black); rust (7.5YR4/6); crumb structure, fine to coarse roots; loamy sand; clear regular boundary                    | 6.8  | 17.3    | 7    | 10   | 83   |
| 3-15 cm   | Matrix: 10YR2/2 (brownish black); diffuse rust spots (7.5YR4/6); very few fine roots; crumb structure; loamy sand                     | 4.5  | 9.0     | 8    | 14   | 78   |
| 15-29 cm  | Matrix: 7.5Y3/1 (olive black); few rust spots (7.5YR4/6); very few fine roots; loamy sand                                             | 1.8  | 4.1     | 4    | 14   | 82   |
| 29-44 cm  | 7.5GY3/1 (dark greenish gray); few rust spots (7.5YR4/4); no rust; friable; loamy sand; clear regular boundary                        | 1.4  | 4.5     | 7    | 17   | 76   |
| 44-49 cm  | N2/0 (black) and 7.5 YR5/4 (dull brown); pieces of wood; loam                                                                         | 14.9 | 18.0    | NA   | NA   | NA   |
| 49-61 cm  | 7.5YR2/1 (black); blue spots of vivianite; pieces of wood; sticky; loamy sand; diffuse boundary                                       | 15.7 | 20.7    | NA   | NA   | NA   |
| 61-76 cm  | N1.5/0 (black); blue spots of vivianite; pieces of wood; sticky; loamy sand                                                           | 17.6 | 22.5    | 5    | 17   | 78   |
| Site II   | Zwart Water: Profile ZW3                                                                                                              | OC   | CEC     | clay | silt | sand |
| Depth     | Description                                                                                                                           | %    | cmol/kg | %    | %    | %    |
| 0-8 cm    | Matrix: 7.5YR2/1 (black); rust (5YR4/8); numerous fine roots; crumb structure; sandy loam; wavy boundary                              | 4.6  | 13.1    | 11   | 23   | 66   |
| 8-19 cm   | Matrix: 7.5YR2/1 (black); rust (5YR3/1); fine roots; sandy loam; crumb structure                                                      | 3.1  | 10.1    | 19   | 38   | 43   |
| 15-27 cm  | Matrix: 10YR2/2 (brownish black); few rust spots (5YR4/8); very few fine roots; friable; sandy loam                                   | 3.6  | 10.5    | NA   | NA   | NA   |
| 27-38 cm  | Matrix: 10YR2/2 (brownish black); rust spots (5YR3/1); very few fine roots; friable; sandy loam                                       | 9.6  | 17.5    | 12   | 35   | 53   |
| 38-46 cm  | Matrix: 10YR2/1 (black); rust spots (5YR5/8); wood fragments; friable; loamy sand                                                     | 6.2  | 13.4    | 13   | 24   | 53   |
| 46-61 cm  | Matrix: 10YR3/3 (brown); rust (5YR3/6) and few spots of vivianite; wood fragments; loose structure; coarse sand                       | 3.9  | 4.6     | 3    | 9    | 88   |
| 61-63 cm  | 7.5GY 4/1 (dark greenish gray) and 5Y2/1 (black); wood fragments; loose structure; sand                                               | 0.4  | 4.0     | 13   | 27   | 60   |
| Site III  | Hulpe: Profile HU1                                                                                                                    | OC   | CEC     | clay | silt | sand |
| Depth     | Description                                                                                                                           | %    | cmol/kg | %    | %    | %    |
| 0-10 cm   | 7.5YR3/3 (dark brown). fine roots. crumb structure. loam                                                                              | 12.9 | 33.8    | 39   | 35   | 26   |
| 10-20 cm  | Matrix: 10YR3/4 (dark brown); rust (5YR4/6. reddish brown); crumb structure; loam                                                     | 11.3 | 32.8    | NA   | NA   | NA   |
| 20-30 cm  | Matrix: 5YR2/2 (brownish black); rust (5YR4/6. reddish brown); crumb structure; loam                                                  | 10.8 | 29.8    | NA   | NA   | NA   |
| 30-47 cm  | 5YR2/3 (very dark reddish brown); plastic and sticky; loamy clay                                                                      | 8.46 | 32.2    | 52   | 39   | 9    |
| 47-55 cm  | 5YR2/3 (very dark reddish brown); sticky; loamy clay                                                                                  | 7.3  | 29.7    | NA   | NA   | NA   |
| 55-80 cm  | 7.5YR2/1 (black); sticky; loamy clay                                                                                                  | 1.53 | 8.9     | NA   | NA   | NA   |
| Site III  | Hulpe: Profile HU2                                                                                                                    | OC   | CEC     |      |      |      |
| Depth     | Description                                                                                                                           | %    | cmol/kg |      |      |      |
| 0-9 cm    | 5YR3/2 (dark reddish brown); fine roots; crumble structure; sandy loam                                                                | 7.23 | NA      |      |      |      |
| 9-36 cm   | Matrix: 5YR4/4 (dull reddish brown); rust (5YR5/8. bright reddish brown); few roots. crumble structure; sandy loam                    | 1.66 | NA      |      |      |      |
| 36-46 cm  | Matrix: 10YR3/2 (dark brown); numerous rust spots (5YR5/8. bright reddish brown); sticky; loam; gradual boundary                      | 1.07 | NA      |      |      |      |
| 46-64 cm  | Matrix: 5YR4/2 (grayish brown); rust (5YR4/6. reddish brown); loamy clay; gradual boundary                                            | 0.97 | NA      |      |      |      |
| 64-80 cm  | Matrix: 5Y4/2 (grayish olive); rust in pores; sticky and plastic; loamy clay                                                          | 0.80 | NA      |      |      |      |
| 80-95 cm  | Matrix: 5Y4/3 (dark olive); numerous rust spots (5YR4/6. reddish brown); sticky; clay                                                 | 0.85 | NA      |      |      |      |
| 95-105 cm | Matrix: 5Y3/1 (olive black); few rust spots; plastic and sticky; clay                                                                 | 1.05 | NA      |      |      |      |
| Site III  | Hulpe: Profile HU3                                                                                                                    | OC   | CEC     |      |      |      |
| Depth     | Description                                                                                                                           | %    | cmol/kg |      |      |      |
| 0-10 cm   | Matrix: 7.5YR3/2 (brownish black); rust; fine roots; sand. loose structure; gradual boundary                                          | 5.35 | 15.8    |      |      |      |
| 10-30 cm  | Matrix: 5YR4/3; rust (bright reddish brown. 5YR5/6); few fine roots; sandy loam; clear boundary                                       | 1.14 | 10.4    |      |      |      |
| 30-52 cm  | Matrix: 7.5YR4/3 (brown); numerous rust spots (bright reddish brown. 5YR5/6). blue spots of vivianite; loamy clay. plastic and sticky | 1.26 | 25.8    |      |      |      |
| 52-60 cm  | Matrix: 7.5YR4/3 (brown); numerous rust spots rust (bright reddish brown. 5YR5/6). blue spots of vivianite; clay. plastic and sticky  | 0.79 | 30.8    |      |      |      |
| 60-70 cm  | Matrix: 7.5YR4/6 (brown); numerous rust spots rust (bright reddish brown. 5YR5/8). blue spots of vivianite; clay. plastic and sticky  | 1.44 | 22.0    |      |      |      |
| Site III  | Hulpe: Profile HU4                                                                                                                    | OC   | CEC     |      |      |      |
| Depth     | Description                                                                                                                           | %    | cmol/kg |      |      |      |
| 0-9 cm    | 7.5YR2/2 (brownish black); sandy loam; crumb structure                                                                                | 5.69 | 16.4    |      |      |      |
| 9-17 cm   | Matrix: 7.5YR4/4 (brown); rust (5YR5/8. bright reddish brown); sandy loam. friable                                                    | 1.37 | 10.6    |      |      |      |
| 17-23 cm  | Matrix: 7.5YR4/6 (brown); rust (5YR5/8. bright reddish brown); sandy loam; friable                                                    | 0.4  | 5.5     |      |      |      |
| 23-100 cm | Matrix: 10YR3/3 (dark brown); rust (5YR56/8. bright reddish brown); blue spots of vivianite; loamy clay                               | 1.34 | 7.3     |      |      |      |

**Table S3** : Element composition of soil profiles, Site I

| <i>Site I</i>                                            |         |       |       |       |       |       |       |       |       |       |      |       |      |      |     |
|----------------------------------------------------------|---------|-------|-------|-------|-------|-------|-------|-------|-------|-------|------|-------|------|------|-----|
| Depth                                                    | Cr      | Ni    | Cu    | Zn    | As    | Cd    | Pb    | Co    | Mn    | S     | Fe   | Ca    | Al   | pH   |     |
| cm                                                       | mg/kg   | mg/kg | mg/kg | mg/kg | mg/kg | mg/kg | mg/kg | mg/kg | mg/kg | mg/kg | %    | %     | %    |      |     |
| <i>Grote Beek, profile GB1a</i>                          |         |       |       |       |       |       |       |       |       |       |      |       |      |      |     |
| <i>Terric Histosol tpto Spodic Regosol, 1 from river</i> |         |       |       |       |       |       |       |       |       |       |      |       |      |      |     |
|                                                          | 0-15    | 129   | 62    | 188   | 1097  | 150   | 16    | 82    | 9     | 520   | 1600 | 9.54  | 3.04 | 2.63 | 6.9 |
|                                                          | 15-30   | 176   | 172   | 109   | 1166  | 171   | 26    | 59    | 9     | 582   | 994  | 9.80  | 3.25 | 2.59 | 6.8 |
|                                                          | 30-45   | 112   | 43    | 110   | 702   | 169   | 22    | 51    | 8     | 434   | 772  | 11.57 | 2.11 | 2.30 | 6.8 |
|                                                          | 45-60   | 58    | 41    | 18    | 174   | 261   | 23    | 24    | 4     | 83    | 608  | 13.69 | 2.99 | 1.92 | 6.6 |
|                                                          | 60-75   | 57    | 21    | 18    | 163   | 127   | 10    | 16    | 2     | 70    | 599  | 7.93  | 3.09 | 1.92 | 6.8 |
|                                                          | 75-90   | 52    | 8     | 4     | 21    | 12    | 0.5   | 8     | 2     | 34    | 12   | 2.76  | 0.49 | 1.94 | 7.4 |
|                                                          | 90-105  | 53    | 10    | 5     | 21    | 12    | 0.6   | 8     | 2     | 45    | 13   | 2.83  | 0.43 | 1.93 | 7.2 |
|                                                          | 105-165 | 47    | 7     | 6     | 34    | 17    | 1.2   | 8     | 2     | 55    | 12   | 3.08  | 0.53 | 1.82 | 7.3 |
| <i>Grote Beek, profile GB1b</i>                          |         |       |       |       |       |       |       |       |       |       |      |       |      |      |     |
| <i>1 m from river</i>                                    |         |       |       |       |       |       |       |       |       |       |      |       |      |      |     |
|                                                          | 0-13    | 104   | 138   | 153   | 2184  | 158   | 158   | 13    | 8     | 106   | 719  | 5.43  | 3.10 | 1.31 | 6.8 |
|                                                          | 13-26   | 142   | 97    | 126   | 1892  | 181   | 136   | 20    | 5     | 110   | 1136 | 7.97  | 2.39 | 1.57 | 6.4 |
|                                                          | 26-44   | 47    | 14    | 12    | 158   | 92    | 13    | 10    | 3     | 47    | 949  | 7.52  | 0.92 | 1.18 | 5.7 |
|                                                          | 44-57   | 32    | 3     | 2     | 31    | 11    | 2     | 4     | 2     | 29    | 557  | 2.90  | 0.20 | 1.21 | 6.0 |
|                                                          | 57-69   | 60    | 6     | 3     | 33    | 11    | 12    | 5     | 2     | 35    | 733  | 3.28  | 0.41 | 1.95 | 6.0 |
|                                                          | 69-82   | 33    | 2     | 2     | 18    | 7     | 0.9   | 4     | 2     | 30    | 185  | 2.15  | 0.16 | 1.36 | 6.3 |
|                                                          | 82-120  | 45    | 4     | 2     | 25    | 9     | 1.5   | 4     | 3     | 30    | 138  | 3.01  | 0.24 | 1.63 | 7   |
| <i>Grote Beek, profile GB2</i>                           |         |       |       |       |       |       |       |       |       |       |      |       |      |      |     |
| <i>Terric Histosol, 25 m from river</i>                  |         |       |       |       |       |       |       |       |       |       |      |       |      |      |     |
|                                                          | 0-30    | 54    | 18    | 16    | 137   | 496   | 9     | 63    | 2     | 45    | NA   | 16.29 | 1.47 | 1.52 | 5.3 |
|                                                          | 30-55   | 46    | 18    | 11    | 154   | 247   | 16    | 19    | 2     | 16    | NA   | 10.63 | 3.64 | 1.05 | 5.3 |
|                                                          | 55-75   | 74    | 11    | 9     | 59    | 30    | 1.3   | 8     | 4     | 39    | NA   | 3.99  | 1.50 | 3.16 | 4.7 |
|                                                          | 75-100  | 57    | 124   | 7     | 72    | 28    | 1.0   | 8     | 3     | 54    | NA   | 3.23  | 1.64 | 2.34 | 4.8 |
|                                                          | 100-125 | 54    | 11    | 6     | 93    | 38    | 1.5   | 8     | 3     | 47    | NA   | 3.33  | 1.24 | 2.26 | 5.1 |
| <i>Grote Beek, profile GB3</i>                           |         |       |       |       |       |       |       |       |       |       |      |       |      |      |     |
| <i>Terric Histosol, 50 m from river</i>                  |         |       |       |       |       |       |       |       |       |       |      |       |      |      |     |
|                                                          | 0-25    | 61    | 21    | 27    | 265   | 101   | 28    | 73    | 3     | 30    | NA   | 6.57  | 2.35 | 1.53 | 5.5 |
|                                                          | 25-50   | 46    | 25    | 9     | 88    | 26    | 12    | 10    | 4     | 25    | NA   | 2.58  | 2.42 | 1.23 | 5   |
|                                                          | 50-75   | 31    | 7     | 3     | 13    | 7     | 0.3   | 6     | 2     | 42    | NA   | 1.21  | 0.41 | 1.49 | 5.2 |
|                                                          | 75-100  | 23    | 5     | 4     | 6     | 4     | 0.2   | 6     | 1     | 23    | NA   | 1.23  | 0.15 | 1.02 | 5.5 |

NA = Not analysed

rust  
 roots  
 vivianite

organic carbon content > 10%  
 organic carbon content between 5% and 10%  
 organic carbon content < 5%

**Table S4** : Element composition of soil profiles, Site II

| <i>Site II</i>                         |       |       |       |       |       |       |       |       |       |       |      |      |      |      |     |  |
|----------------------------------------|-------|-------|-------|-------|-------|-------|-------|-------|-------|-------|------|------|------|------|-----|--|
| Depth                                  | Cr    | Ni    | Cu    | Zn    | As    | Cd    | Pb    | Co    | Mn    | S     | Fe   | Ca   | Al   | P    | pH  |  |
| cm                                     | mg/kg | %    | %    | %    | %    |     |  |
| <i>Zwart Water: Profile ZW1</i>        |       |       |       |       |       |       |       |       |       |       |      |      |      |      |     |  |
| <i>Gleyic Cambisol, 1 from river</i>   |       |       |       |       |       |       |       |       |       |       |      |      |      |      |     |  |
| 0-10                                   | 19    | 4     | 11    | 96    | 40    | 3     | 10    | 3     | 114   | 162   | 7.6  | 0.24 | 0.58 | 0.69 | 6.6 |  |
| 10-20                                  | 15    | 3     | 2     | 24    | 12    | 1     | 4     | 3     | 120   | 95    | 11.1 | 0.17 | 1.27 | 0.97 | 5.7 |  |
| 20-27                                  | 19    | 4     | 4     | 46    | 30    | 2     | 8     | 3     | 162   | 127   | 5.6  | 0.14 | 1.11 | 0.55 | 5.5 |  |
| 27-39                                  | 15    | 2     | 2     | 23    | 38    | 0.3   | 6     | 2     | 105   | 67    | 3.9  | 0.08 | 1.11 | 0.08 | 5.2 |  |
| 39-45                                  | 10    | 2     | 2     | 8     | 22    | 0.2   | 4     | 1     | 41    | 124   | 1.8  | 0.06 | 0.99 | 0.03 | 5.6 |  |
| 45-58                                  | 9     | 1     | 2     | 7     | 23    | 0.2   | 4     | 2     | 51    | 92    | 2.4  | 0.06 | 0.96 | 0.06 | 5.6 |  |
| 58-63                                  | 17    | 2     | 2     | 15    | 179   | 0.1   | 5     | 3     | 107   | 296   | 18.8 | 0.40 | 0.89 | 0.25 | NA  |  |
| 63-83                                  | 18    | 2     | 2     | 24    | 69    | 0.1   | 17    | 3     | 242   | 404   | 23.5 | 0.57 | 0.39 | 1.00 | NA  |  |
| 83-95                                  | 10    | 2     | 3     | 16    | 87    | 0.1   | 3     | 2     | 117   | 504   | 17.7 | 0.39 | 0.36 | 0.36 | 5.1 |  |
| <i>Zwart Water: Profile ZW2</i>        |       |       |       |       |       |       |       |       |       |       |      |      |      |      |     |  |
| <i>Eutric Gleysol, 25 m from river</i> |       |       |       |       |       |       |       |       |       |       |      |      |      |      |     |  |
| 0-5                                    | 16    | 2     | 5     | 48    | 70    | 0.9   | 15    | 3     | 124   | 284   | 5.8  | 0.23 | 0.80 | 0.13 | 5.1 |  |
| 5-15                                   | 15    | 2     | 3     | 25    | 145   | 0.4   | 10    | 2     | 79    | 270   | 9.4  | 0.19 | 0.88 | 0.16 | 4.4 |  |
| 15-29                                  | 12    | 1     | 1     | 8     | 24    | 0.0   | 4     | 2     | 57    | 30    | 4.2  | 0.10 | 0.73 | 0.13 | 4.5 |  |
| 29-44                                  | 13    | 1     | 2     | 13    | 8     | 0.1   | 5     | 2     | 38    | 100   | 2.0  | 0.07 | 0.83 | 0.06 | 4.5 |  |
| 44-49                                  | 44    | 5     | 6     | 24    | 26    | 0.2   | 8     | 4     | 84    | NA    | 10.0 | 0.35 | 2.13 | 0.23 | NA  |  |
| 49-61                                  | 43    | 4     | 6     | 18    | 18    | 0.1   | 8     | 3     | 55    | NA    | 5.0  | 0.41 | 2.16 | 0.19 | NA  |  |
| 61-76                                  | 16    | 2     | 2     | 50    | 43    | 0.1   | 3     | 3     | 100   | NA    | 10.0 | 0.58 | 0.42 | 1.71 | NA  |  |
| <i>Zwart Water: Profile ZW3</i>        |       |       |       |       |       |       |       |       |       |       |      |      |      |      |     |  |
| <i>Eutric Gleysol, 50 m from river</i> |       |       |       |       |       |       |       |       |       |       |      |      |      |      |     |  |
| 0-8                                    | 18    | 2     | 6     | 44    | 44    | 0.8   | 17    | 3     | 100   | NA    | 5.0  | 0.25 | 0.92 | 0.10 | 5.1 |  |
| 8-19                                   | 15    | 2     | 3     | 22    | 98    | 0.3   | 13    | 2     | 108   | NA    | 8.7  | 0.24 | 0.96 | 0.14 | 4.8 |  |
| 19-27                                  | 15    | 2     | 3     | 18    | 46    | 0.2   | 6     | 2     | 79    | NA    | 7.3  | 0.21 | 0.77 | 0.15 | 4.2 |  |
| 27-38                                  | 26    | 4     | 4     | 19    | 43    | 0.2   | 5     | 5     | 90    | NA    | 20.6 | 0.50 | 1.20 | 0.33 | NA  |  |
| 38-46                                  | 23    | 4     | 4     | 23    | 13    | 0.0   | 8     | 3     | 204   | NA    | 8.3  | 0.15 | 0.74 | 0.14 | NA  |  |
| 46-61                                  | 7     | 2     | 2     | 10    | 3     | 0.1   | 3     | 1     | 64    | NA    | 1.4  | 0.05 | 0.29 | 0.04 | 4.1 |  |
| 61-63                                  | 17    | 3     | 2     | 11    | 2     | 0.0   | 6     | 1     | 34    | NA    | 0.5  | 0.06 | 0.89 | 0.01 | 3.9 |  |

  

NA = Not analysed

rust

roots

vivianite

organic carbon content > 10%

organic carbon content between 5% and 10%

organic carbon content < 5%

**Table S5** : Element composition of soil profiles, Site III

| <i>Site III</i>           |             |             |             |             |             |             |             |             |             |            |         |         |         |        |     |
|---------------------------|-------------|-------------|-------------|-------------|-------------|-------------|-------------|-------------|-------------|------------|---------|---------|---------|--------|-----|
| Depth<br>cm               | Cr<br>mg/kg | Ni<br>mg/kg | Cu<br>mg/kg | Zn<br>mg/kg | As<br>mg/kg | Cd<br>mg/kg | Pb<br>mg/kg | Co<br>mg/kg | Mn<br>mg/kg | S<br>mg/kg | Fe<br>% | Ca<br>% | Al<br>% | P<br>% | pH  |
| <i>Hulpe, Profile HU1</i> |             |             |             |             |             |             |             |             |             |            |         |         |         |        |     |
| <i>1 m from rivier</i>    |             |             |             |             |             |             |             |             |             |            |         |         |         |        |     |
| 0-10                      | 94          | 22          | 104         | 718         | 71          | 17          | 77          | 5           | 120         | 1242       | 19.2    | 2.51    | 1.93    | 2.85   | 6.8 |
| 10-20                     | 152         | 28          | 147         | 1046        | 133         | 34          | 90          | 6           | 296         | 425        | 18.1    | 2.41    | 2.23    | 3.31   | 6.4 |
| 20-30                     | 220         | 35          | 449         | 3019        | 136         | 77          | 111         | 7           | 387         | 536        | 15.9    | 1.92    | 2.28    | 3.64   | 6.1 |
| 30-47                     | 207         | 45          | 751         | 4840        | 232         | 159         | 130         | 7           | 521         | 933        | 16.1    | 2.31    | 2.47    | 4.45   | 6.6 |
| 47-55                     | 215         | 57          | 198         | 2709        | 228         | 163         | 76          | 9           | 510         | 948        | 15.8    | 2.08    | 2.81    | 3.67   | 6.4 |
| 55-80                     | 65          | 18          | 34          | 299         | 39          | 17          | 28          | 6           | 617         | 282        | 4.25    | 0.51    | 1.75    | 0.35   | 6.5 |
| <i>Hulpe, Profile HU2</i> |             |             |             |             |             |             |             |             |             |            |         |         |         |        |     |
| <i>15 m from river</i>    |             |             |             |             |             |             |             |             |             |            |         |         |         |        |     |
| 0-9                       | 48          | 20          | 22          | 160         | 19          | 7           | 59          | 6           | 284         | 665        | 3.2     | 0.6     | 3.79    | 0.14   | 5.2 |
| 9-36                      | 45          | 17          | 12          | 72          | 15          | 1.3         | 30          | 8           | 494         | 17         | 4.1     | 0.4     | 4.37    | 0.06   | 5.7 |
| 36-46                     | 47          | 17          | 10          | 56          | 16          | 0.4         | 22          | 7           | 460         | 28         | 4.0     | 0.5     | 4.83    | 0.07   | 6.0 |
| 46-64                     | 55          | 19          | 11          | 53          | 18          | 0.3         | 27          | 8           | 427         | 30         | 4.4     | 0.5     | 4.89    | 0.08   | 6.3 |
| 64-80                     | 60          | 23          | 13          | 65          | 32          | 0.3         | 21          | 8           | 663         | 23         | 4.2     | 0.5     | 6.0     | 0.07   | 6.4 |
| 80-95                     | 72          | 27          | 15          | 71          | 93          | 0.2         | 26          | 11          | 725         | 33         | 8.2     | 0.4     | 5.43    | 0.11   | 5.4 |
| 95-105                    | 75          | 28          | 15          | 84          | 46          | 0.3         | 29          | 12          | 246         | 18         | 8.2     | 0.4     | 6.27    | 0.18   | 5.8 |
| <i>Hulpe, Profile HU3</i> |             |             |             |             |             |             |             |             |             |            |         |         |         |        |     |
| <i>25 m from river</i>    |             |             |             |             |             |             |             |             |             |            |         |         |         |        |     |
| 0-10                      | 44          | 18          | 19          | 145         | 23          | 6           | 55          | 6           | 140         | 1319       | 3.85    | 0.38    | 3.01    | 0.11   | 5.0 |
| 10-30                     | 36          | 14          | 10          | 49          | 12          | 0.8         | 23          | 6           | 460         | 74         | 2.83    | 0.29    | 3.5     | 0.05   | 5.3 |
| 30-52                     | 82          | 28          | 15          | 75          | 23          | 0.4         | 37          | 12          | 746         | 70         | 5.8     | 0.44    | 6.11    | 0.06   | 5.8 |
| 52-60                     | 84          | 31          | 15          | 79          | 19          | 0.3         | 36          | 13          | 905         | 26         | 5.34    | 0.44    | 7.23    | 0.05   | 6.2 |
| 60-70                     | 46          | 20          | 8           | 65          | 117         | 0.3         | 26          | 12          | 1413        | 56         | 20.5    | 0.47    | 3.7     | 0.42   | 5.5 |
| <i>Hulpe, Profile HU4</i> |             |             |             |             |             |             |             |             |             |            |         |         |         |        |     |
| <i>50 m van river</i>     |             |             |             |             |             |             |             |             |             |            |         |         |         |        |     |
| 0-9                       | 39          | 19          | 18          | 155         | 20          | 8           | 56          | 6           | 233         | 1288       | 3.12    | 0.376   | 2.86    | 0.11   | 5.4 |
| 9-17                      | 31          | 13          | 8           | 68          | 12          | 1.3         | 23          | 4           | 114         | 56         | 2.53    | 0.244   | 2.71    | 0.04   | 5.4 |
| 17-23                     | 20          | 5           | 4           | 37          | 8           | 0.4         | 11          | 2           | 107         | 46         | 1.56    | 0.29    | 0.93    | 0.03   | 5.8 |
| 23-100                    | 74          | 27          | 15          | 96          | 24          | 0.5         | 33          | 12          | 870         | 53         | 5.94    | 0.458   | 6.83    | 0.06   | 5.6 |

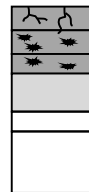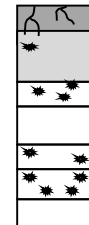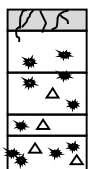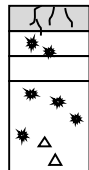

- rust
- roots
- vivianite

- organic carbon content > 10%
- organic carbon content between 5% and 10%
- organic carbon content < 5%

**Table S6:** Element composition of porewater, Site I

| Site I                   |            |            |            |            |            |            |            |            |            |            |            |            |            |          |
|--------------------------|------------|------------|------------|------------|------------|------------|------------|------------|------------|------------|------------|------------|------------|----------|
| Depth<br>cm              | Cr<br>µg/l | Ni<br>µg/l | Cu<br>µg/l | Zn<br>µg/l | As<br>µg/l | Cd<br>µg/l | Pb<br>µg/l | Co<br>µg/l | Mn<br>µg/l | Al<br>µg/l | Fe<br>mg/l | Ca<br>mg/l | Cl<br>mg/l | MC<br>w% |
| Grote Beek, Profile GB1a |            |            |            |            |            |            |            |            |            |            |            |            |            |          |
| 0-15                     | 1          | 43         | 51         | <1         | <1         | 1          | <1         | 1          | 3          | 175        | 2.69       | 56         | 909        | 49.6     |
| 15-30                    | 2          | 56         | 56         | <1         | 2          | 1          | <1         | 1          | 3          | 203        | 2.72       | 57         | 4543       | 45.0     |
| 30-45                    | 2          | 33         | 40         | 6          | <1         | 3          | <1         | 1          | 3          | 231        | 3.31       | 72         | 2068       | 45.6     |
| 45-60                    | 5          | 66         | 62         | 59         | 3          | 5          | <1         | 2          | 66         | 152        | 6.18       | 179        | 4653       | 54.2     |
| 60-75                    | 6          | 61         | 53         | 47         | 4          | <1         | 32         | 2          | 159        | 248        | 6.85       | 199        | 7970       | 54.7     |
| 75-90                    | 5          | 96         | 95         | 446        | <1         | 1          | <1         | 2          | 69         | 387        | 7.02       | 139        | 4853       | 20.8     |
| 90-105                   | 6          | 58         | 61         | 616        | 5          | 3          | <1         | 2          | 255        | 528        | 7.27       | 194        | 5766       | 17.9     |
| 105-165                  | 17         | 138        | 158        | 1034       | 18         | 6          | 15         | 6          | 235        | 930        | 17.22      | 466        | 5989       | 20.5     |
| Grote Beek, Profile GB1b |            |            |            |            |            |            |            |            |            |            |            |            |            |          |
| 0-13                     | 6          | 99         | 81         | 217        | 23         | 3          | <0         | 1          | 10         | 618        | 7          | 36         | 109        | 23.5     |
| 13-26                    | <1         | 269        | 48         | 392        | <1         | 80         | <0         | 1          | 10         | 337        | 8          | 554        | 912        | 28.8     |
| 26-44                    | <1         | 100        | 99         | 187        | <1         | 40         | 25         | <0         | 11         | 276        | 35         | 1154       | 1638       | 33.1     |
| 44-57                    | 4          | 320        | 296        | 277        | <1         | 7          | 35         | 2          | 31         | 2126       | 64         | 1217       | 1855       | 13.5     |
| 57-69                    | <1         | 84         | 65         | 85         | <1         | 4          | 10         | <0         | 7          | 580        | 35         | 1201       | 1903       | 22.7     |
| 69-82                    | <1         | 73         | 45         | 155        | <1         | 9          | <0         | 2          | 28         | 458        | 27         | 1208       | 1727       | 18.9     |
| 82-120                   | 1          | 54         | 33         | 93         | <1         | 4          | 14         | <0         | 20         | 359        | 30         | 1128       | 1752       | 22.0     |
| Grote Beek, Profile GB2  |            |            |            |            |            |            |            |            |            |            |            |            |            |          |
| 0-30                     | 2          | 24         | 31         | 830        | <1         | 4          | <1         | 1          | 7          | 323        | 2.28       | 375        | 872        | 52.8     |
| 30-55                    | 3          | 16         | 32         | 48         | <1         | 1          | <1         | 1          | 8          | 152        | 2.61       | 531        | 1033       | 72.6     |
| 55-75                    | 2          | 39         | 36         | 61         | <1         | 3          | <1         | 3          | 161        | 254        | 3.40       | 590        | 1699       | 60.8     |
| 75-100                   | 1          | 26         | 28         | 60         | <1         | 1          | <1         | 3          | 381        | 97         | 4.47       | 557        | 1479       | 63.6     |
| 100-125                  | 2          | 33         | 23         | 117        | <1         | 1          | <1         | 12         | 591        | 108        | 74.50      | 522        | 819        | 51.0     |
| Grote Beek, Profile GB3  |            |            |            |            |            |            |            |            |            |            |            |            |            |          |
| 0-25                     | 1          | 23         | 40         | <1         | <1         | 1          | <1         | <1         | 5          | 399        | 2.58       | 53         | 254        | 65.2     |
| 25-50                    | <1         | 12         | 25         | <1         | <1         | <1         | <1         | <1         | 17         | 207        | 1.75       | 135        | 316        | 67.9     |
| 50-75                    | <1         | 7          | 23         | <1         | <1         | <1         | <1         | <1         | 27         | 311        | 1.91       | 52         | 193        | 24.6     |
| 75-100                   | 2          | 22         | 22         | <1         | <1         | <1         | <1         | <1         | 61         | 708        | 4.85       | 26         | 120        | 29.3     |

MC = moisture content in wt%

NA = not analysed

**Table S7:** Element composition of porewater, Site II

| <i>Site II</i>           |            |            |            |            |            |            |            |            |            |            |            |            |            |          |
|--------------------------|------------|------------|------------|------------|------------|------------|------------|------------|------------|------------|------------|------------|------------|----------|
| Depth<br>cm              | Cr<br>µg/l | Ni<br>µg/l | Cu<br>µg/l | Zn<br>µg/l | As<br>µg/l | Cd<br>µg/l | Pb<br>µg/l | Co<br>µg/l | Mn<br>µg/l | Al<br>µg/l | Fe<br>mg/l | Ca<br>mg/l | Cl<br>mg/l | MC<br>w% |
| Zwart Water, profile ZW1 |            |            |            |            |            |            |            |            |            |            |            |            |            |          |
| 0-10                     | 1          | 19         | 5          | 102        | 3          | 3          | <1         | 2          | 255        | 512        | 29.2       | 18         | 119        | 27.4     |
| 10-20                    | <1         | 14         | 178        | <3         | <1         | <1         | 10         | <1         | 4          | 200        | <0,1       | 24         | 114        | 23.4     |
| 20-27                    | <1         | 30         | 22         | 1          | <1         | <1         | <1         | 1          | 11         | 277        | 0.1        | 29         | 106        | 23.4     |
| 27-39                    | <1         | 9          | 15         | <3         | <1         | <1         | <1         | <1         | 5          | 213        | 0.4        | 8          | 92         | 20.8     |
| 39-45                    | <1         | 14         | <1         | 12         | <1         | <1         | <1         | 1          | 16         | 93         | 2.9        | 12         | 92         | 18.6     |
| 45-58                    | <1         | 12         | <1         | <3         | <1         | <1         | <1         | <1         | 8          | 139        | 2.2        | 7          | 95         | 20.6     |
| 58-63                    | <1         | NA         | NA       |
| 63-83                    | <1         | 9          | <1         | <3         | <1         | <1         | <1         | 1          | 2          | 28         | 0.6        | 7          | <40        | 59.4     |
| 83-95                    | <1         | 6          | <1         | 5          | <1         | <1         | <1         | <1         | 7          | 78         | 2.9        | 7          | <40        | 60.5     |
| Zwart Water, profile ZW2 |            |            |            |            |            |            |            |            |            |            |            |            |            |          |
| 0-5                      | <1         | 30         | <1         | 81         | <1         | <1         | 17         | <1         | 18         | 136        | 2.5        | 8          | NA         | 33.3     |
| 5-15                     | <1         | 15         | <1         | <3         | 7          | <1         | <1         | 1          | <1         | 65         | 6.8        | 8          | NA         | 32.3     |
| 15-29                    | <1         | 9          | <1         | <3         | <1         | <1         | <1         | <1         | 2          | 92         | 0.4        | 8          | NA         | 24.0     |
| 29-44                    | <1         | 27         | <1         | <3         | <1         | <1         | <1         | <1         | 22         | 149        | 6.5        | 11         | NA         | 22.4     |
| 44-49                    | <1         | 8          | <1         | <3         | <1         | <1         | <1         | <1         | 6          | 304        | 3.4        | 5          | NA         | 54.5     |
| 49-61                    | <1         | 4          | <1         | <3         | <1         | <1         | <1         | <1         | 2          | 148        | <0,1       | 4          | NA         | 56.0     |
| 61-76                    | <1         | 8          | <1         | <3         | <1         | <1         | <1         | <1         | 1          | 91         | 1.2        | 6          | NA         | 53.8     |
| Zwart Water, profile ZW3 |            |            |            |            |            |            |            |            |            |            |            |            |            |          |
| 0-8                      | 4          | 55         | 53         | 66         | 50         | 1          | 108        | 2          | 356        | 287        | 55.3       | 19         | NA         | 31.8     |
| 8-19                     | <1         | 7          | <1         | 10         | 22         | <1         | 36         | <1         | 83         | 502        | 31.8       | 8          | NA         | 25.0     |
| 19-27                    | <1         | 9          | <1         | <3         | 7          | <1         | <1         | <1         | 50         | 358        | 26.3       | 6          | NA         | 30.0     |
| 27-38                    | <1         | 12         | <1         | <3         | <1         | <1         | <1         | 1          | 5          | 49         | 4.0        | 5          | NA         | 54.9     |
| 38-46                    | <1         | 21         | 20         | 61         | <1         | 1          | 5          | <1         | 21         | 701        | 4.0        | 7          | NA         | 41.1     |
| 46-61                    | <1         | 4          | <1         | <3         | <1         | <1         | <1         | 1          | 3          | 59         | <0,1       | 8          | NA         | 32.3     |
| 61-63                    | <1         | 18         | 9          | <3         | <1         | <1         | <1         | <1         | 9          | 537        | <0,1       | 14         | NA         | 24.0     |

MC = moisture content in wt%

NA = not analysed



**Table S8:** Element composition of porewater, Site III

| <i>Site III</i>    |            |            |            |            |            |            |            |            |            |            |            |            |            |           |
|--------------------|------------|------------|------------|------------|------------|------------|------------|------------|------------|------------|------------|------------|------------|-----------|
| Depth<br>cm        | Cr<br>µg/l | Ni<br>µg/l | Cu<br>µg/l | Zn<br>µg/l | As<br>µg/l | Cd<br>µg/l | Pb<br>µg/l | Co<br>µg/l | Mn<br>µg/l | Al<br>µg/l | Fe<br>µg/l | Ca<br>mg/l | Cl<br>mg/l | MC<br>wt% |
| Hulpe, Profile HU1 |            |            |            |            |            |            |            |            |            |            |            |            |            |           |
| 0-10               | 13         | 27         | 59         | 153        | 19         | 4          | 11         | 5          | 22         | <1         | 903        | 352        | 1469       | 54.5      |
| 10-20              | 47         | 97         | 55         | 235        | 9          | 4          | 242        | 9          | 823        | <1         | 2655       | 388        | 1418       | 53.9      |
| 20-30              | 1          | 135        | 116        | 354        | 18         | 5          | 32         | 9          | 922        | <1         | 2373       | 336        | 1222       | 48.5      |
| 30-47              | 10         | 48         | 90         | 165        | 23         | 12         | 40         | 7          | 630        | <1         | 379        | 195        | 784        | 48.6      |
| 47-55              | <1         | 39         | 55         | 113        | 30         | 5          | <1         | 5          | 343        | <1         | 265        | 175        | 818        | 43.6      |
| 55-80              | <1         | 127        | 65         | 2428       | 15         | 12         | 65         | 7          | 270        | 420        | 1026       | 190        | 898        | 23.2      |
| Hulpe, Profile HU2 |            |            |            |            |            |            |            |            |            |            |            |            |            |           |
| 0-9                | NA         | 29.9      |
| 9-36               | NA         | 19.7      |
| 36-46              | NA         | 21.5      |
| 46-64              | NA         | 23.3      |
| 64-80              | NA         | 26.6      |
| 80-95              | <1         | 31         | 42         | 264        | 14         | 2          | 30         | 4          | 19         | <1         | <1         | 23         | NA         | 31.4      |
| 95-105             | <1         | 27         | 50         | 227        | 15         | 2          | 21         | 4          | 35         | <1         | <1         | 16         | 314        | 40.9      |
| Hulpe, Profile HU3 |            |            |            |            |            |            |            |            |            |            |            |            |            |           |
| 0-10               | <1         | 29         | 83         | 342        | 10         | 3          | 31         | 4          | 27         | <1         | <1         | 27         | 361        | 34.0      |
| 10-30              | <1         | 23         | 105        | 521        | 36         | 4          | 33         | 6          | 20         | <1         | <1         | 9          | NA         | 20.0      |
| 30-52              | NA         | 26.7      |
| 52-60              | NA         | 27.6      |
| 60-70              | <1         | 39         | 96         | 557        | 33         | 4          | 37         | 6          | 18         | <1         | <1         | 25         | 152        | 37.2      |
| Hulpe, Profile HU4 |            |            |            |            |            |            |            |            |            |            |            |            |            |           |
| 0-9                | 4          | 70         | 91         | 754        | 14         | 4          | 59         | 6          | 30         | <1         | <1         | 39         | NA         | 30.6      |
| 9-17               | NA         | 17.5      |
| 17-23              | NA         | 4.7       |
| 23-100             | NA         | 30.6      |

MC = moisture content in wt%

NA = not analysed

**Table S9:** Indicative concentrations (based on between aqua regia extraction) and concentrations obtained in this work ("3-acid" extraction) (this work) concentrations (mg/kg) of Cd, Cr, Cu, Ni, Pb, and Zn in reference material BCR 701. Mean  $\pm$  standard deviation of 3 replicates

|           | <b>Indicative concentrations (mg/kg)</b> |       |     | <b>This study (mg/kg)</b> |       |     |
|-----------|------------------------------------------|-------|-----|---------------------------|-------|-----|
| <b>Cd</b> | 11.7                                     | $\pm$ | 1.0 | 10.9                      | $\pm$ | 0.2 |
| <b>Cr</b> | 272                                      | $\pm$ | 20  | 284                       | $\pm$ | 5   |
| <b>Cu</b> | 275                                      | $\pm$ | 13  | 242                       | $\pm$ | 2   |
| <b>Ni</b> | 103                                      | $\pm$ | 4   | 99                        | $\pm$ | 7   |
| <b>Pb</b> | 143                                      | $\pm$ | 6   | 141                       | $\pm$ | 3   |
| <b>Zn</b> | 454                                      | $\pm$ | 19  | 465                       | $\pm$ | 4   |





**Table S13:** Data and calculations used to construct Figure 5

| <b>L1</b>  |             |                |          |                          |          |          |
|------------|-------------|----------------|----------|--------------------------|----------|----------|
| <b>L/S</b> | <b>time</b> | <b>V</b>       | <b>x</b> | <b>x<sub>cumul</sub></b> | <b>C</b> | <b>S</b> |
| l/kg       | year        | m <sup>3</sup> | cm       | cm                       | mg/kg    | mg/kg    |
| 20         | 1.1         | 0.56           | 0.16     | 0.16                     | 1.98     | 4        |
| 40         | 2.2         | 1.12           | 0.49     | 0.65                     | 1.46     | 4        |
| 60         | 3.4         | 1.68           | 0.89     | 1.38                     | 1.16     | 4        |
| 80         | 4.5         | 2.24           | 1.34     | 2.23                     | 0.96     | 4        |
| 100        | 5.6         | 2.80           | 1.82     | 3.15                     | 0.86     | 4        |

  

| <b>L5</b>  |             |                |          |                          |          |          |
|------------|-------------|----------------|----------|--------------------------|----------|----------|
| <b>L/S</b> | <b>time</b> | <b>V</b>       | <b>x</b> | <b>x<sub>cumul</sub></b> | <b>C</b> | <b>S</b> |
| l/kg       | year        | m <sup>3</sup> | cm       | cm                       | mg/kg    | mg/kg    |
| 20         | 1.1         | 0.56           | 0.16     | 0.16                     | 8.76     | 19       |
| 40         | 2.2         | 1.12           | 0.49     | 0.65                     | 6.44     | 19       |
| 60         | 3.4         | 1.68           | 0.88     | 1.37                     | 4.66     | 19       |
| 80         | 4.5         | 2.24           | 1.31     | 2.18                     | 3.80     | 19       |
| 100        | 5.6         | 2.80           | 1.78     | 3.09                     | 3.82     | 19       |
